# Supplementary material for: Identification and localization of Tospovirus genus-wide conserved residues in 3D models of the nucleocapsid and the silencing suppressor proteins
Source: PubMed Central journal article supplement (PMC6330412; doi:10.1186/s12985-018-1106-4), 2019-01-11
Supplement: 12985_2018_1106_MOESM2_ESM.pdf [file 12985_2018_1106_MOESM2_ESM.pdf]

$\alpha 1$   $\alpha 2$   
 TSWV 1 10 20 TT 30 40  
 TSWV MS . . . . . KVKLT KES I VAL L T . QGK D L E F E E D Q N . . L V A F N F K T F C L G N L D Q I . K K  
 ANSV MS . . . . . KAKLT REN I I N L L T . Q S A E V E F E E E Q N . . Q A A F N F Q N F C Q D N L D L V . K K  
 BeNMV M . . . . . G . S N A L . . K L N A E N L K K L L L . F N D E V E F E . . Q Q . . S T G F N F V D F C K A . H E K D . K F  
 CCSV MS N V R G . . . . . L T Q Q K I K D L L A G G K A D V E I D S E E Q . . T L G F N F S T F Y E S N K T G . . A E  
 CaCV MS T V R Q . . . . . L T E K K I R E L L A G G T A D V E I E T D D S . . T P G F S F K A F Y D S N K S . . V E  
 CSNV MS . . . . . K V K L T K E N I V A L L T . Q A G E V F E E E Q N . . Q I A F N F Q S F C N D N L D Q I . K N  
 GBNV MS N V K Q . . . . . L T E K K I K E L L A G G S A D V E I E T E D S . . T P G F S F K A F Y D T N K N . . L E  
 GCFSV MS . . . . . K . . . . . T K V K N D K E L F E S L S R N A K I E L S Q E . . Q A N F N F K K F F S E N N S K . . V E  
 GRSV MS . . . . . K V K L T K E N I V S L L T . Q S A D V E F E E D Q N . . O V A F N F K T F C Q E N L D L I . K K  
 GYSV MS T K G V . . . . . V K V K N D R E L F E S L S K N A K V E L E Q E . . Q I S F N F K T F F D S K S S K . . V D  
 HCRV MS T A R L . . . . . . S K A N V E K L L A G G E A D V E I E A E E . . T T G F N F K E F V L A N G N . . V K  
 INSV MN . . . . . K A K I T K E N I V K L L T . Q S D S L E F E E T Q N . . E G S F N F T D F F T N R E K I . Q N  
 IYSV MS T V R V . . . . . . K P S E I E K L L S G G D V D V V I E S D E . . T E G F N F K N F V L A N E G . . V Q  
 LNRV MA . . . . . V E L N D A N V K H I L E G G E V I E P K N K P A S R D S A F K F D E F C V A Y G N . . V A  
 MSMV MS . . . . . K V K L T K D N I I K L L S . S N A E I F E E E Q N . . O S T F O F D T F F D A N V E K L . K N  
 MYSV MS T V A K . . . . . L T K E K I Q E L L S G G K S E V E I E T E E S . . T E G F N F H S F F T D V R D E . . V K  
 MVBaV MS T V R Q . . . . . L S E S K I T A L L A G G K A D V E I E T E E S . . T P G F N F K A F F D K N H D . . V E  
 PCSV MS . . . . . K V K L T K E N I I A L L T . Q S A E V F E E D Q N . . Q T A F N F K T F C H D N L D L L . K K  
 PNSV MS N V R K T . . . . . L S N E K I K E L L A G G D A D I E I E L D E A . . T P G F S F S K F Y D D N K A D I F G K  
 PhySMV MS T V A K . . . . . L T K E K I Q E L L S G G K S E V E I E T E E S . . T E G F N F H S F F A D V R D E . . V K  
 PolRSV MS T T G L . . . . . . S K E N V E K L L A G G D A D V E I E A E E . . T A G F N F K Q F F T D N S K . . M K  
 SVNaV MP Q T A G P S N A K P A K I T E S N L A K L L K . F E E D I E F E . . K N . . S T G F K F S E F Y K T . H M G R . K F  
 TCSV MS N V R S . . . . . K V K L T R E N I I S L L T . Q A G E I F E E D Q N . . Q A A F N F K T F C G E N L D S I . K K  
 TNeV MS T V R Q . . . . . L T E K K I R E L L A G G T A D V E I E T D D S . . T P G F S F K A F Y D S N K N . . V E  
 TNRV MS N V R K T . . . . . L S N E K I K E L L A G G E A D I E I E L D E A . . T P G F S F S K F Y D E N K Q D I F G K  
 TNSV MS T V R G . . . . . L T N Q K I K D L L S G G K A D V E I D S D D L . . T L G F N F N S F Y E E N K P A . . A E  
 TYRV MA T A R V . . . . . . S K E N I E K L L A G G E A D V V I E A E E . . T A G F N F K E F V L A N K A . . M K  
 TZSV MS N V R S . . . . . L T Q Q K V Q E L L A G G K A D V E I D T D D Q . . T Q G F S F A S F Y C E N R A K . . A D  
 WBNV MS T V K Q . . . . . L T D K K I K D L L A G G A A D V E I E T E D A . . T P G F S F K S F Y D N N K D . . V E  
 WSMoV MS N V K Q . . . . . L T E K K I K E L L A G G T A D V E I E T E D S . . T P G F S F K A F Y D N N K N . . I E  
 ZLCV MS . . . . . K V K L T K E N I V A L L T . Q A T E V F E E E Q N . . Q T A F N F K T S Y E G N L K L I . K N

$\alpha 3$   $\alpha 4$   $\beta 1$   $\beta 2$   $\alpha 5$   
 TSWV 50 60 70 80 90 100  
 TSWV MS I I S C L T F L K N R . . . . . Q S I M K V I K Q S D F T F G K I T I K K T . . . S D R I G A T D M T F R R L D S L I R  
 ANSV MS I T S C L T F L K N R . . . . . Q S I M K V I K Q S D F T F G R I T I K K T . . . S E R I G A T D M T F R R L D S M I R  
 BeNMV N . P T S A L T F L K N R . . . . . K A I Y S L C K A S T F N Y G V Y E I K K . . . G D K A T D T D F T F R R L D A F L R  
 CCSV MS T F T T G I N I L K C R . . . . . K Q V F A A C K S G K Y E F C G K K V A T . T D E V S A . . T D W T F R R L D T E A F I R  
 CaCV MT F T N C L N I L K C R . . . . . K Q I F A A C K S G K Y K F C D K T I V S T . A A D V G P . . D D W T F R R L D E A L I R  
 CSNV MN L I S C L T F L K N R . . . . . Q S I M K V V K Q S D F T F G K I T T K K N . . . S D R I G P N D M T F R R L D S L I R  
 GBNV I T F T N C L N I L K C R . . . . . K Q I F A A C K S G K Y F C G K T I V A T . N T D V G P . . D D W T F R R L D T E A F I R  
 GCFSV I S D E N M I L F I N N S N K M K A I G R . . . E S S V S K Y L G H S I V K S . . . . . S P G V N E F T T W S R M D S L I R  
 GRSV MS I T S C L T F L K N R . . . . . Q S I M K V V N Q S D F T F G K V T I K K N . . . S E R V G A K D M T F R R L D S M I R  
 GYSV L T E A N M V L Y I N S A N R L K I G K . . . E N N A K T F L N I N I V K S . . . . . S P G V D E F T T W S R L D S V I R  
 HCRV MT F N N G Y T I L R N R . . . . . A A I Y K M V K A G N F K F Q G K P I V V P . N A T S N P G Q E D W T F R R L D L E G F I R  
 INSV MT T A S C L S F L K N R . . . . . Q S I M R V I K S A D F T F G S V T I K K T R N N S E R V G V N D M T F R R L D A M V I R  
 IYSV MT F N N G Y T I L R N R . . . . . A G I Y K T I K T G K F T F Q G K T I V I P . S A N V S P N Q D D W T F R R L D G F I R  
 LNRV I K L A G M A S L L R R R . . . . . E S I V D L F K K D T L K . L G A T V Y K L P E N R N N P G P N D W T A G R F E S F I R  
 MSMV MT V M S C L T F L K N R . . . . . Q S I M K V V K Q A D F T F N G I T I K K S . . . K P K I E P K D M T F R R L D A M I R  
 MYSV L N Y N N G I T I L K S R . . . . . K Q V Y A A C K S G N Y K F C G K K I V A S . G D N V G P . . N D W T F R R L D T E A V I R  
 MVBaV I T F A T C L N I L K S R . . . . . K Q I F A A C K N G K Y N F C G H N I A T . T A N A G I . . D D W T F R R L D E A L I R  
 PCSV MN I T S C L T F L K N R . . . . . Q S I M K V V K Q I D F T F G K I T I K K T . . . S E R I G A T D M T F R R L D S M I R  
 PNSV F T F N N G I T I L K S R . . . . . K Q I F A A C K N N Q F V F C G K Q I A Q N . S D N A D E . . K T W T F R R L D A V L I R  
 PhySMV L N Y N N G I T I L K S R . . . . . K Q V Y A A C K S G N Y K F C G K K I V A S . G D N V G P . . N D W T F R R L D T E A V I R  
 PolRSV MT F N N G F T I L R N R . . . . . A A I Y K M V K A G H F K F Q G K S I V V P . S S T S S P G Q D D W T F R R L D L E G F I R  
 SVNaV R . Y A S A L T F L K N R . . . . . K A I V N M C K K G T F N F D G Q T V K L S V E S G D . . D N S F T F R R L D S F L R  
 TCSV MS I T S C L T F L K N R . . . . . Q S I M K V V N Q S D F T F G K I T I K K N . . . S G R V G A N D M T F R R L D S M I R  
 TNeV MT F T N C L N I L K C R . . . . . K Q I F A A C K S G K Y K F C D K T I V S T . A A D V G P . . D D W T F R R L D E A L I R  
 TNRV F T F N N G I T I L K S R . . . . . K Q I F A A C K S N Q F V F C G K Q I A Q N . S D T A D E . . K T W T F R R L D A V L I R  
 TNSV F T F V T G L N I L K C R . . . . . K Q V F A A C K S G K Y E F C G K K I V A T . T D D V S A . . T D W T F R R L D T E A F I R  
 TYRV MT F N N G Y T I L R N R . . . . . A G I Y K M V K A G Q F K F Q G N P I I V P . S A T V S A G Q D D W T F R R L D L E G F I R  
 TZSV F T Y N T G I N I L K C R . . . . . K Q V F A A C K N G K Y E F C G H K I V A S . S A D V S A . . T D W T F R R L D T E A F I R  
 WBNV I T F T T C L N I L K C R . . . . . K Q I F T A C K N G K Y N F C G K N I V A T . T A Q V G P . . D D W T F R R L D T E A F I R  
 WSMoV I T F T N C L N I L K C R . . . . . K Q I F A A C K S G K Y N F C G K N I V A T . S V D V G P . . E D W T F R R L D T E A F I R  
 ZLCV MS I T S C L T F L K N R . . . . . Q S I M K V V K Q S D F N F G K V T I K K V . . . S D K I G P N D M T F R R L D S M I R

| TSWV   | α6   |      |        |       | α7    |        |      |      | α8  |       |      |      |      |      |       |       |       |       |     |     |     |    |     |     |   |     |      |      |       |      |    |     |    |   |   |   |     |   |   |   |   |   |   |   |   |   |   |   |   |   |   |   |   |
|--------|------|------|--------|-------|-------|--------|------|------|-----|-------|------|------|------|------|-------|-------|-------|-------|-----|-----|-----|----|-----|-----|---|-----|------|------|-------|------|----|-----|----|---|---|---|-----|---|---|---|---|---|---|---|---|---|---|---|---|---|---|---|---|
|        | 110  | 120  | 130    | 140   | 150   | 160    | 170  | 180  | 190 | 200   | 210  |      |      |      |       |       |       |       |     |     |     |    |     |     |   |     |      |      |       |      |    |     |    |   |   |   |     |   |   |   |   |   |   |   |   |   |   |   |   |   |   |   |   |
| TSWV   | VRLV | EETG | ...NSE | NL    | ..NT  | IKS    | KIAS | HP   | LI  | QAYG  | LT   | LD   | ...  | DAKS | VRLAI | MLGG  | PLP   |       |     |     |     |    |     |     |   |     |      |      |       |      |    |     |    |   |   |   |     |   |   |   |   |   |   |   |   |   |   |   |   |   |   |   |   |
| ANSV   | VKLI | QETA | ...NAV | NL    | ..DA  | IKT    | KIAS | HP   | LV  | QAYG  | LP   | LN   | ...  | DAKS | VRLAI | MLGG  | IP    |       |     |     |     |    |     |     |   |     |      |      |       |      |    |     |    |   |   |   |     |   |   |   |   |   |   |   |   |   |   |   |   |   |   |   |   |
| BeNMV  | VKLL | THCT | KIWDG  | TD    | NAQ   | ..TAL  | CE   | ELAK | IP  | VKAYG | LE   | VS   | ...  | DKQK | CYIAI | VLGG  | NLS   |       |     |     |     |    |     |     |   |     |      |      |       |      |    |     |    |   |   |   |     |   |   |   |   |   |   |   |   |   |   |   |   |   |   |   |   |
| CCSV   | AKLI | SMVE | HTTDE  | AT    | KKL   | ...MYT | KAME | LP   | LV  | VAYG  | LN   | VP   | AEF  | HYAA | LRLML | CI    | GGPLP |       |     |     |     |    |     |     |   |     |      |      |       |      |    |     |    |   |   |   |     |   |   |   |   |   |   |   |   |   |   |   |   |   |   |   |   |
| CaCV   | VKMI | NMIE | KNKNE  | AAK   | QE    | ...MYS | KVME | LP   | LV  | AAAYG | LN   | IP   | PAS  | DS   | CA    | LRLML | CI    | GGPLP |     |     |     |    |     |     |   |     |      |      |       |      |    |     |    |   |   |   |     |   |   |   |   |   |   |   |   |   |   |   |   |   |   |   |   |
| CSNV   | VKLI | GRTK | ...SDE | DL    | ...NT | IKS    | KIAS | HP   | LV  | QAYG  | LS   | LN   | ...  | DAKS | VRLAI | MLGG  | SLP   |       |     |     |     |    |     |     |   |     |      |      |       |      |    |     |    |   |   |   |     |   |   |   |   |   |   |   |   |   |   |   |   |   |   |   |   |
| GBNV   | TKMA | SMVE | KSKND  | AAK   | QE    | ...MYN | KIME | LP   | LV  | AAAYG | LN   | VP   | PAS  | DT   | CA    | LRLML | CI    | GGPLP |     |     |     |    |     |     |   |     |      |      |       |      |    |     |    |   |   |   |     |   |   |   |   |   |   |   |   |   |   |   |   |   |   |   |   |
| GCF5V  | MKYI | ERVK | DYGD   | DR    | MAEN  | ...A   | KL   | TN   | WL  | LEV   | FN   | ..L  | HT   | DAMS | PR    | DE    | VIF   | KV    | V   | TGG | NLN |    |     |     |   |     |      |      |       |      |    |     |    |   |   |   |     |   |   |   |   |   |   |   |   |   |   |   |   |   |   |   |   |
| GRSV   | VKLI | EETA | ...NN  | NL    | ..AI  | IK     | KIAS | HP   | LV  | QAYG  | LP   | LA   | ...  | DAKS | VRLAI | MLGG  | IP    |       |     |     |     |    |     |     |   |     |      |      |       |      |    |     |    |   |   |   |     |   |   |   |   |   |   |   |   |   |   |   |   |   |   |   |   |
| GYSV   | MKYI | DRIK | DYNE   | D     | KL    | AE     | ...A | KL   | NN  | WL    | E    | IF   | ..L  | TK   | ..Q   | MS    | P     | K     | DE  | VIF | KV  | V  | TGG | NLN |   |     |      |      |       |      |    |     |    |   |   |   |     |   |   |   |   |   |   |   |   |   |   |   |   |   |   |   |   |
| HCRV   | AKMF | MEL  | LAVEN  | STE   | Q     | ...M   | YE   | KL   | CD  | LP    | MV   | NA   | Y    | G    | L     | K     | P     | S     | P   | R   | F   | D  | A   | T   | T | A   | R    | V    | M     | L    | T  | G   | G  | P | L | P |     |   |   |   |   |   |   |   |   |   |   |   |   |   |   |   |   |
| INSV   | VHLV | GM   | IKD    | ...NG | S     | ALT    | EA   | INS  | ..L | P     | SP   | H    | LI   | AS   | Y     | G     | L     | AT    | ... | D   | L   | K  | S   | C   | V | L   | G    | V    | L     | G    | G  | P   | L  | P |   |   |     |   |   |   |   |   |   |   |   |   |   |   |   |   |   |   |   |
| IYSV   | ARML | VELI | ETK    | DE    | KE    | ...M   | YE   | KI   | C   | G     | L    | P    | V    | S    | A     | Y     | G     | L     | K   | P   | S   | S  | K   | F   | H | A   | T    | T    | A     | R    | I  | M   | L  | T | G | G | P   | L | P |   |   |   |   |   |   |   |   |   |   |   |   |   |   |
| LNRV   | YR   | ..I  | CL     | KA    | ES    | D      | KE   | LAK  | T   | ...S  | I    | E    | I    | L    | Q     | D     | T     | P     | L   | A   | Y   | I  | Y   | G   | L | K   | S    | M    | P     | I    | N  | D   | T  | D | D | M | K   | L | I | A | C | F | S | L | R | L | N |   |   |   |   |   |   |
| MSMV   | AKMI | EFTA | ...K   | DE    | AL    | ...E   | I    | I    | K   | V     | K    | I    | S    | S    | H     | P     | L     | M     | A   | Y   | S   | L  | D   | V   | N | ... | DAKS | A    | R     | I    | A  | C   | L  | G | G | S | L   | P |   |   |   |   |   |   |   |   |   |   |   |   |   |   |   |
| MSYV   | TLMI | S    | IA     | E     | K     | T      | E    | N    | E   | E     | E    | K    | ...M | Y    | E     | K     | A     | M     | Q   | L   | P   | V  | A   | A   | Y | G   | L    | T    | V     | P    | A  | K   | F  | D | M | T | A   | L | R | L | M | L | C | I | G | G | P | L | S |   |   |   |   |
| MVBaV  | VKMI | RM   | VEK    | ...A  | AS    | NE     | S    | K    | L   | A     | M    | Y    | Q    | K    | V     | M     | E     | L     | P   | V   | S   | A  | Y   | G   | L | N   | A    | P    | P     | E    | F  | N   | A  | C | A | L | R   | L | M | L | C | I | G | G | P | L | S |   |   |   |   |   |   |
| PCSV   | VKLI | EETA | ...NA  | E     | NL    | ..L    | A    | I    | K   | T     | K    | I    | A    | S    | H     | P     | L     | V     | Q   | A   | Y   | G  | L   | P   | L | T   | ...  | DAKS | VRLAI | MLGG | S  | L   | P  |   |   |   |     |   |   |   |   |   |   |   |   |   |   |   |   |   |   |   |   |
| PNSV   | VLMS | KM   | VEE    | C     | T     | T      | Q    | K    | L   | Q     | ...M | Y    | T    | K    | L     | M     | S     | L     | P   | M   | V   | I  | A   | Y   | G | L   | N    | V    | P     | P    | N  | F   | D  | V | A | A | T   | R | L | M | L | C | V | G | G | P | L | P |   |   |   |   |   |
| PhySMV | TLMI | S    | IA     | E     | K     | T      | E    | N    | E   | E     | E    | K    | ...M | Y    | E     | K     | A     | M     | Q   | L   | P   | V  | A   | A   | Y | G   | L    | T    | V     | P    | A  | K   | F  | D | M | T | A   | L | R | L | M | L | C | I | G | G | P | L | S |   |   |   |   |
| PoIRSV | AKMF | MEL  | L      | I     | N     | M      | E    | N    | A   | V     | E    | Q    | ...M | Y    | E     | K     | C     | E     | L   | P   | M   | V  | NA  | Y   | G | L   | K    | P    | S     | S    | K  | F   | D  | P | T | T | A   | R | V | M | L | T | G | G | P | L | P |   |   |   |   |   |   |
| SVNaV  | VKML | E    | H      | N     | F     | A      | V    | D    | G   | T     | N    | E    | E    | A    | K     | ..Q   | S     | L     | C   | N   | D   | L  | A   | T   | I | P   | L    | V    | Q     | A    | Y  | G   | L  | T | V | K | ... | D | K | M | S | A | K | L | A | I | M | T | G | G | S | L | P |
| TCSV   | TRLI | S    | MA     | E     | H     | A      | T    | D    | E   | T     | T    | K    | ...M | Y    | I     | K     | A     | M     | E   | L   | P   | V  | A   | A   | Y | G   | L    | N    | V     | P    | D  | F   | N  | S | S | A | I   | R | L | M | L | C | I | G | G | S | L | P |   |   |   |   |   |
| TNeV   | VKMI | NMIE | KNKNE  | AAK   | QE    | ...M   | Y    | S    | K   | V     | M    | E    | L    | P    | V     | AA    | Y     | G     | L   | N   | I   | P  | A   | S   | F | DS  | CA   | L    | R     | L    | M  | L   | C  | I | G | G | P   | L | P |   |   |   |   |   |   |   |   |   |   |   |   |   |   |
| TNRV   | VLMA | KM   | VEE    | C     | T     | T      | Q    | K    | L   | Q     | ...M | Y    | S    | K    | L     | M     | S     | L     | P   | M   | V   | I  | A   | Y   | G | L   | N    | V    | P     | P    | N  | F   | D  | S | C | A | L   | R | L | M | L | C | V | G | G | P | L | P |   |   |   |   |   |
| TNSV   | AKLI | S    | M      | I     | E     | K      | T    | G    | D   | E     | T    | S    | K    | ...M | Y     | T     | K     | V     | M   | E   | L   | P  | V   | S   | A | Y   | G    | L    | N     | V    | P  | N   | E  | F | S | S | A   | A | L | R | L | M | L | C | I | G | G | P | L | P |   |   |   |
| TYRV   | AKMF | MEL  | L      | I     | A     | V      | E    | N    | A   | S     | E    | Q    | ...M | Y    | E     | K     | C     | E     | L   | P   | M   | V  | NA  | Y   | G | L   | K    | P    | S     | P    | K  | F   | D  | A | T | T | A   | R | V | M | L | T | G | G | P | L | P |   |   |   |   |   |   |
| TZSV   | TRLI | S    | MA     | E     | H     | A      | T    | D    | E   | T     | T    | K    | ...M | Y    | I     | K     | A     | M     | E   | L   | P   | V  | A   | A   | Y | G   | L    | N    | V     | P    | D  | F   | N  | S | S | A | I   | R | L | M | L | C | I | G | G | S | L | P |   |   |   |   |   |
| WBNV   | TKMV | SM   | VE     | K     | S     | T      | N    | E    | N   | A     | K    | ...M | Y    | T    | K     | I     | M     | E     | L   | P   | V   | AA | Y   | G   | L | N   | V    | P    | AA    | Y    | DS | CA  | L  | R | L | M | L   | C | I | G | G | P | L | P |   |   |   |   |   |   |   |   |   |
| WSMoV  | TKIV | SM   | VE     | K     | S     | K      | N    | E    | A   | A     | R    | ...M | Y    | G    | K     | I     | M     | E     | L   | P   | V   | AA | Y   | G   | L | N   | V    | P    | S     | S    | Y  | DS  | CA | L | R | L | M   | L | C | I | G | G | P | L | P |   |   |   |   |   |   |   |   |
| ZLCV   | VKPI | E    | A      | T     | A     | ...N   | D    | E    | N   | L     | ..S  | A    | I    | R    | S     | K     | I     | A     | S   | H   | P   | L  | V   | Q   | A | Y   | G    | L    | S     | L    | T  | ... | N  | A | K | S | V   | R | L | A | I | M | L | G | G | S | L | P |   |   |   |   |   |

| TSWV   | η1  |     | α9  |     |     |     | α10 |     |     |     | α11 |     |     |    |   |   |   |   |   |   |   |   |   |     |     |   |     |     |   |   |   |     |   |     |     |     |     |   |   |   |   |   |   |   |   |   |   |   |   |   |   |     |
|--------|-----|-----|-----|-----|-----|-----|-----|-----|-----|-----|-----|-----|-----|----|---|---|---|---|---|---|---|---|---|-----|-----|---|-----|-----|---|---|---|-----|---|-----|-----|-----|-----|---|---|---|---|---|---|---|---|---|---|---|---|---|---|-----|
|        | 160 | 170 | 180 | 190 | 200 | 210 | 220 | 230 | 240 | 250 | 260 | 270 | 280 |    |   |   |   |   |   |   |   |   |   |     |     |   |     |     |   |   |   |     |   |     |     |     |     |   |   |   |   |   |   |   |   |   |   |   |   |   |   |     |
| TSWV   | LI  | AS  | V   | D   | S   | F   | E   | M   | I   | S   | V   | V   | LA  | I  | Y | Q | A | K | Y | K | D | L | G | I   | D   | P | K   | K   | Y | D | T | R   | E | A   | L   | ... | G   | K | V | C | T | V | L | K | S | K | A | F | E | M | T |     |
| ANSV   | LI  | AS  | V   | D   | S   | F   | E   | M   | I   | S   | V   | V   | LA  | I  | Y | Q | A | K | C | K | D | L | G | I   | N   | P | K   | K   | Y | D | T | K   | E | A   | L   | ... | G   | K | V | C | T | V | L | K | S | K | G | F | S | M | D |     |
| BeNMV  | LL  | AS  | L   | P   | G   | C   | E   | V   | A   | C   | F   | LA  | I   | F  | Q | D | L | K | K | N | E | L | G | I   | K   | S | D   | ..F | D | T | K | D   | Q | A   | ... | G   | R   | V | A | A | V | L | D | A | K | N | F | V | F | G |   |     |
| CCSV   | LL  | SS  | L   | P   | G   | L   | A   | P   | V   | C   | F   | LA  | I   | F  | Q | N | V | K | K | E | Q | L | G | I   | K   | N | ..F | S   | T | Y | E | Q   | I | ... | C   | K   | V   | A | K | V | L | S | A | S | V | E | F | A |   |   |   |     |
| CaCV   | LL  | SS  | I   | K   | G   | L   | A   | P   | I   | I   | F   | LA  | I   | F  | Q | N | V | K | K | E | K | L | G | I   | K   | N | ..F | S   | T | Y | E | Q   | V | ... | C   | K   | V   | A | K | V | L | S | A | S | Q | V | E | F | K |   |   |     |
| CSNV   | LI  | AS  | V   | D   | S   | F   | E   | M   | I   | S   | V   | V   | LA  | I  | Y | Q | D | S | K | H | K | E | L | G   | I   | D | E   | K   | K | Y | D | T   | K | E   | A   | L   | ... | G | K | V | C | T | V | L | K | S | K | G | F | A | I | D   |
| GBNV   | LL  | SS  | M   | T   | G   | L   | A   | P   | I   | I   | F   | LA  | I   | F  | Q | N | V | K | K | E | K | L | G | I   | K   | N | ..F | S   | T | Y | E | Q   | V | ... | C   | K   | V   | A | K | V | L | S | A | S | Q | I | E | F | K |   |   |     |
| GCF5V  | HL  | M   | G   | F   | K   | T   | T   | F   | A   | H   | A   | F   | LA  | I  | Y | Q | H | K | R | S | E | E | L | G   | I   | K | N   | ..F | D | T | K | A   | Q | L   | ... | D   | R   | M | V | V | I | G | E | R | C | S | L | L | P | S | P | ... |
| GRSV   | LI  | AS  | V   | D   | S   | F   | E   | M   | I   | S   | V   | V   | LA  | I  | Y | Q | A | K | Y | K | E | L | G | I   | E   | P | T   | K   | Y | N | T | K   | E | A   | L   | ... | G   | K | V | C | T | V | L | K | S | K | G | F | T | M | D |     |
| GYSV   | LM  | M   | C   | F   | K   | T   | T   | F   | A   | H   | A   | F   | LA  | I  | Y | Q | H | K | R | A | E | Q | L | G   | I   | T | N   | ..F | D | T | K | A   | Q | L   | ... | D   | R   | M | I | V | I | G | E | R | N | K | V | L | P | S | T | ... |
| HCRV   | LM  | AS  | L   | D   | K   | F   | A   | A   | A   | F   | LA  | I   | F   | Q  | N | V | K | K | E | A | Q | I | N | K   | ..F | S | T   | Y   | E | Q | L | ... | C | K   | I   | A   | R   | V | M | A | T | K | E | F | V | F | T |   |   |   |   |     |
| INSV   | LI  | AS  | V   | L   | N   | F   | E   | I   | A   | A   | L   | V   | LA  | I  | Y | Q | A | K | H | V | E | L | G | I   | D   | M | S   | K   | F | S | T | K   | E | A   | V   | ... | G   | K | V | C | T | V | L | K | S | K | G | Y | S | M | N |     |
| IYSV   | LM  | AS  | L   | D   | I   | F   | A   | A   | A   | L   | P   | LA  | I   | F  | Q | N | V | K | K | E | A | L | G | I   | S   | R | ..F | S   | T | Y | E | Q   | L | ... | C   | K   | V   | A | R | V | M | A | A | K | E | F | K | F | T |   |   |     |
| LNRV   | HL  | A   | S   | M   | P   | K   | T   | C   | R   | H   | A   | M   | A   | VA | I | Y | R | H | C | K | D | M | V | ..R | K   | E | F   | H   | D | T | E | T   | L | E   | R   | ... | V   | C | T | V | A | K | A | T | G | F | V | F | D |   |   |     |
| MSMV   | LL  | AS  | I   | P   | H   | Y   | E   | A   | I   | C   | L   | V   | LA  | I  | Y | Q | A | K | S | Q | E | L | G | I   | D   | Q | K   | K   | Y | D | T | K   | E | A   | I   | ... | G   | K | V | C | T | V | L | K | S | K | G | Y | V | M | D |     |
| MSYV   | LL  | AS  | L   | H   | S   | L   | C   | P   | V   | V   | L   | LA  | I   | F  | Q | N | V | K | K | E | Q | L | G | I   | K   | N | ..F | S   | T | Y | E | Q   | I | ... | C   | K   | I   | A | R | V | M | S | A | S | N | M | T | F | K |   |   |     |
| MVBaV  | LL  | SS  | F   | K   | A   | L   | A   | P   | I   | V   | F   | LA  | I   | F  | Q | N | V | K | K | E | K | L | G | I   | K   | N | ..F | S   | T | Y | E | Q   | V | ... | C   | K   | V   | A | K | V | L | S | A | A | Q | F | D | F | Q |   |   |     |
| PCSV   | LI  | AS  | V   | D   | S   | F   | E   | M   | I   | S   | V   | V   | LA  | I  | Y | Q | A | K | C | K | D | L | G | I   | D   | P | K   | K   | Y | D | T | K   | E | A   | I   | ... | G   | K | V | C | T | V | L | K | S | K | G | F | L | M | D |     |
| PNSV   | LL  | SS  | L   | A   | P   | M   | A   | P   | I   | T   | F   | LA  | I   | F  | Q | N | V | K | K | Q | N | L | G | I   | K   | N | ..F | S   | T | Y | E | Q   | L | ... | C   | K   | V   | A | R | V | C | D | A | A | Q | I | E | F | K |   |   |     |
| PhySMV | LL  | AS  | L   | H   | S   | L   | C   | P   | V   | V   | L   | LA  | I   | F  | Q | N | V | K | K | E | Q | L | G | I   | K   | N | ..F | S   | T | Y | E | Q   | I | ... | C   | K   | I   | A | R | V | M | S | A | S | N | M | T | F | K |   |   |     |
| PoIRSV | LM  | AS  | L   | D   | K   | F   | A   |     |     |     |     |     |     |    |   |   |   |   |   |   |   |   |   |     |     |   |     |     |   |   |   |     |   |     |     |     |     |   |   |   |   |   |   |   |   |   |   |   |   |   |   |     |

|               | $\alpha 12$      |         |       |        | $\eta 2$             |        |         |      | $\alpha 13$          |        |          |               |              |
|---------------|------------------|---------|-------|--------|----------------------|--------|---------|------|----------------------|--------|----------|---------------|--------------|
| <i>TSWV</i>   | 0000000000000000 |         |       |        | 000 00..000000000000 |        |         |      | 000 00..000000000000 |        |          |               |              |
|               | 210              |         | 220   |        | 230                  |        | 240     |      | 240                  |        | 240      |               |              |
| <i>TSWV</i>   | EDQV             | KKGKEY  | AA    | TLSSN  | .....                | FNAKGS | VAME    | ..   | HYSE                 | TLNK   | FYEMF    | GV.....       |              |
| <i>ANSV</i>   | DTQV             | TKGREY  | AA    | TLSSN  | .....                | FNAKGS | VAME    | ..   | HYSE                 | HLNK   | FYEMF    | GV.....       |              |
| <i>BeNMV</i>  | EPENE            | LKKI    | AG    | TLKEM  | T.....               | PTRRGH | AAL     | IT.. | KYAE                 | QLSI   | ISGVI    | GVTFEMPG...   |              |
| <i>CCSV</i>   | DKTK             | ELFDST  | VK    | TLGDS  | S.....               | PGTAGA | ISLH    | ..   | KYNS                 | QLKQ   | MEAF     | NAKLNVD       |              |
| <i>CaCV</i>   | EDLD             | KLFKQA  | VK    | TLSES  | N.....               | PGTASS | ISLK    | ..   | KYDE                 | QVKY   | MDKVF    | SANLSVDDYGEH  |              |
| <i>CSNV</i>   | EQQME            | KGKEY   | AN    | TLKACD | .....                | FRMKGA | IAME    | ..   | HYSD                 | SLNK   | FYEMF    | GV.....       |              |
| <i>GBNV</i>   | NELEEM           | PKSAV   | KL    | TLSEN  | .....                | PGTASS | ISLK    | ..   | KYDE                 | QVKY   | MDKVF    | SASLSMDDYGEH  |              |
| <i>GCFSV</i>  | .....            | TPKT    | LIESY | FRNAV  | P                    | KAKSD  | SKDQSS  | KYND | LQNA                 | IAAVN  | FEVPWRQV | MLYQ          |              |
| <i>GRSV</i>   | DAQIN            | KGKEY   | AK    | TLSSN  | .....                | FNAKGS | IAMD    | ..   | YSDN                 | LDFY   | ESV      | GV.....       |              |
| <i>GYSV</i>   | .....            | APLT    | LINQY | FKNAM  | P                    | KVKA   | AERDQSS | KYEE | LQAA                 | IG..   | NGEL     | .....         |              |
| <i>HCRV</i>   | GTAK             | EIFEET  | IK    | TLNDCT | .....                | PGTTGA | ASLN    | ..   | KFNE                 | QIKALE | NVFG     | ..KIVDDNEAS   |              |
| <i>INSV</i>   | SVEIG            | KAKQY   | AD    | TLKACS | .....                | PKAKGL | AAMD    | ..   | HYKE                 | EGLTS  | IYSMF    | NAT.....I..   |              |
| <i>IYSV</i>   | EKYK             | IFDET   | IK    | TLTDC  | T.....               | PGTSGA | ASLI    | ..   | KFNE                 | QIKILE | GA       | FG..KIVEDIG.E |              |
| <i>LNRV</i>   | ED.....          | FYRI    | V     | LKFRN  | .....                | AKIIST | GAAQAVM | EYHG | SIKK                 | AIESL  | GGTFNY   | TPSHRT        |              |
| <i>MSMV</i>   | NDQLE            | KAKMY   | AQ    | TLKCD  | .....                | PKLKGD | MAMN    | ..   | HYEAG                | LKQI   | IYEIF    | GV.....G..    |              |
| <i>MSV</i>    | KEFDE            | LKSCV   | VK    | TLADCK | .....                | PGTTSG | ISLK    | ..   | IYNE                 | QVQF   | MEQAF    | KSSLVDDGMGES  |              |
| <i>MVBaV</i>  | GDFKT            | LFEEA   | VK    | TLSES  | N.....               | PGTASS | ISLK    | ..   | KYDE                 | QVKY   | MDKVF    | SSSLVDDYGEN   |              |
| <i>PCSV</i>   | ESQVN            | KGKEY   | AT    | TLSSN  | .....                | FNAKGS | VAME    | ..   | YSDN                 | LNKFY  | EMF      | GV.....       |              |
| <i>PNSV</i>   | GDVEK            | LFN     | SATD  | V      | LKSS                 | T..... | PGTASS  | VSLK | ..                   | KYSE   | QISY     | LEKAF         | SAKAVVDDFGSN |
| <i>PhySMV</i> | KEFDE            | LKSCV   | VK    | TLADCK | .....                | PGTTSG | ISLK    | ..   | IYNE                 | QVQF   | MEQAF    | KSSLVDDGMGES  |              |
| <i>PolRSV</i> | GASKA            | I       | FEET  | IK     | TLNDCT               | .....  | PGTAGA  | ASLN | ..                   | KFNE   | QIKALE   | NVFG          | G..KIVDDNNAG |
| <i>SVNaV</i>  | EEKNQ            | LRL     | IAE   | TLKDMA | .....                | PQMRGV | ASLE    | ..   | KYNE                 | QIGI   | ISDII    | GVHFEMPGKK..  |              |
| <i>TCSV</i>   | EAOVQ            | KGKEY   | AT    | TLSSN  | .....                | FNAKGS | IAME    | ..   | HYSE                 | HLNK   | FYEMF    | GV.....       |              |
| <i>TNeV</i>   | EDLD             | KLFKQA  | VK    | TLSES  | N.....               | PGTASS | ISLK    | ..   | KYDE                 | QVKY   | MDKVF    | SANLSVDDYGEH  |              |
| <i>TNRV</i>   | GDLLK            | LFESATA | IA    | LKTS   | S.....               | PGTASS | ISLK    | ..   | KYSE                 | QIAH   | LEKAF    | GSKPVDDFGSN   |              |
| <i>TNSV</i>   | DQVQ             | ELFSSV  | VK    | TLGDS  | N.....               | PGTAGA | ISLN    | ..   | KYND                 | QLKHM  | ESAF     | NSKLNID       |              |
| <i>TYRV</i>   | GVSKD            | I       | FEET  | IK     | TLNDCT               | .....  | PGTAGA  | ASLN | ..                   | KFNE   | QIKALE   | NVFG          | G..KIVDDNGAG |
| <i>TZSV</i>   | EKTQ             | ELFTST  | VK    | TLSES  | N.....               | PGTAGA | ISLH    | ..   | KYND                 | QLKQ   | METAF    | KSSLNVD       |              |
| <i>WBNV</i>   | GEMDK            | MFKSA   | VE    | TLKSN  | .....                | PGTASS | ISLK    | ..   | KYD                  | DQVKY  | MDRIF    | NSSLSMDDYGEH  |              |
| <i>WSMoV</i>  | DDL              | DVMPKQA | VK    | TLSES  | N.....               | PGTASS | ISLK    | ..   | KYED                 | QVKY   | MDRIF    | SANLSVDDYGDH  |              |
| <i>ZLCV</i>   | DAQME            | KGKEY   | AN    | TLKACD | .....                | ERLKGS | VAME    | ..   | HYSE                 | TLNK   | FYEMF    | GV.....       |              |

|               | $\alpha 14$ |       | $\eta 3$ |            |
|---------------|-------------|-------|----------|------------|
| <i>TSWV</i>   | 000..0000   |       | 0000     |            |
|               | 250         |       |          |            |
| <i>TSWV</i>   | ...KK..     | QAK   | ...L     | TELA...    |
| <i>ANSV</i>   | ...KK..     | ESK   | ...I     | SGVA...    |
| <i>BeNMV</i>  | .T.S        | KAKE  | SKNH     | GFMS.....  |
| <i>CCSV</i>   | SK.Q...     | SKKK  | SG...DL  | TF         |
| <i>CaCV</i>   | S...KK..    | SKP   | PSTS...  | IEV        |
| <i>CSNV</i>   | ...QK..     | GSK   | LIPK     | DLV....    |
| <i>GBNV</i>   | SK.KK..     | SKA   | GPS...   | LEL        |
| <i>GCFSV</i>  | VLNI        | YLLI  | VKA      | FLF.....   |
| <i>GRSV</i>   | ...KK..     | EAK   | ...I     | AGVA...    |
| <i>GYSV</i>   | .....       | ..... | .....    | .....      |
| <i>HCRV</i>   | SS.K        | PRSA  | SKK      | ...NQGF... |
| <i>INSV</i>   | .D.FG...    | KND   | SI.....  | .....      |
| <i>IYSV</i>   | SS.K        | PKTP  | SKK      | DRYN.....  |
| <i>LNRV</i>   | IRGA        | EGGS  | SDS      | .....      |
| <i>MSMV</i>   | .S.K        | KAST  | SKV      | FIEI.....  |
| <i>MSV</i>    | SS.K...     | SKA   | SSRS     | KSIEV      |
| <i>MVBaV</i>  | S...KK..    | KSQ   | PSTSN..  | SIEV       |
| <i>PCSV</i>   | ...KK..     | EAK   | ...I     | AGVA...    |
| <i>PNSV</i>   | S...AS..    | T     | SKP      | TRG..SMS.  |
| <i>PhySMV</i> | SS.K...     | SKA   | SSRS     | KSIEV      |
| <i>PolRSV</i> | SS.K        | PRPA  | SKK      | ...NQGF... |
| <i>SVNaV</i>  | .D.G        | KGK   | SK...    | EPSV.....  |
| <i>TCSV</i>   | ...RK..     | EAK   | ...I     | AGVA...    |
| <i>TNeV</i>   | S...KK..    | SKL   | STS...   | IEV        |
| <i>TNRV</i>   | S...VS..    | T     | SKP      | TRG..SIG.  |
| <i>TNSV</i>   | SK.PG..     | S     | SKK      | PSKL..SL.. |
| <i>TYRV</i>   | SS.K        | PKPS  | SKK      | ...NDAF... |
| <i>TZSV</i>   | SK.Q...     | AP    | KKSS     | N..DLSF    |
| <i>WBNV</i>   | S...KK..    | SKA   | SSS...   | LEV        |
| <i>WSMoV</i>  | S...KK..    | SKP   | PSTS...  | LEV        |
| <i>ZLCV</i>   | ...KK..     | E     | KH       | VPKG.VA... |
