# Supplementary material for: Identification and localization of Tospovirus genus-wide conserved residues in 3D models of the nucleocapsid and the silencing suppressor proteins
Source: PubMed Central journal article supplement (PMC6330412; doi:10.1186/s12985-018-1106-4), 2019-01-11
Supplement: 12985_2018_1106_MOESM3_ESM.pdf [file 12985_2018_1106_MOESM3_ESM.pdf]

$\alpha 3$   $\beta 6$   $\beta 7$   $\beta 8$  TT  
 TSWV 150 160 170 180 190

|        |       |     |        |        |       |       |        |         |        |        |        |        |           |               |       |       |       |       |   |       |   |   |   |   |   |   |   |   |   |   |   |   |   |   |       |   |   |   |   |   |   |
|--------|-------|-----|--------|--------|-------|-------|--------|---------|--------|--------|--------|--------|-----------|---------------|-------|-------|-------|-------|---|-------|---|---|---|---|---|---|---|---|---|---|---|---|---|---|-------|---|---|---|---|---|---|
| TSWV   | QEKD  | TIF | NDRY   | TEAVN  | KG    | SLSCV | KEHAYK | T       | EMCYNL | AL     | GKVN   | .....  | VL        | SPNR          |       |       |       |       |   |       |   |   |   |   |   |   |   |   |   |   |   |   |   |   |       |   |   |   |   |   |   |
| BeNMV  | NNDD  | IEI | KNET   | INALP  | SM    | NMIHL | KEHAYK | I       | TKSPNC | FE     | GKRN   | .....  | MLR       | RG            |       |       |       |       |   |       |   |   |   |   |   |   |   |   |   |   |   |   |   |   |       |   |   |   |   |   |   |
| CCSV   | KLKG  | LP  | FGWY   | VDECK  | KH    | DFYIS | NSGDIS | L       | DYGF   | FP     | VMGKT  | .....  | T         | SYWRE         |       |       |       |       |   |       |   |   |   |   |   |   |   |   |   |   |   |   |   |   |       |   |   |   |   |   |   |
| CACV   | RSND  | LLP | SDWC   | LDEFW  | KNN   | NFYIA | TNGEFS | L       | DYGF   | FS     | VMGKT  | .....  | T         | SYWRE         |       |       |       |       |   |       |   |   |   |   |   |   |   |   |   |   |   |   |   |   |       |   |   |   |   |   |   |
| CSNV   | QEKD  | TIF | NDRY   | IEAAN  | KG    | SLSCV | KESTYE | V       | KMCHNQ | AL     | GKVN   | .....  | VL        | SPNR          |       |       |       |       |   |       |   |   |   |   |   |   |   |   |   |   |   |   |   |   |       |   |   |   |   |   |   |
| GBNV   | RSNG  | LLP | SGWY   | QDECC  | KNN   | NFYIA | TNGDLT | L       | DYGF   | FS     | VMGKT  | .....  | T         | SYWRE         |       |       |       |       |   |       |   |   |   |   |   |   |   |   |   |   |   |   |   |   |       |   |   |   |   |   |   |
| GCFSV  | YKFV  | YNP | GMLG   | LESETN | T     | VIF   | FVEKLG | L       | PAH    | AS     | AF     | GNNFDR | CHFSGSSVP | .....         |       |       |       |       |   |       |   |   |   |   |   |   |   |   |   |   |   |   |   |   |       |   |   |   |   |   |   |
| GRSV   | QEED  | I   | IPDDKY | I      | SAAN  | KG    | SLSCV  | KEHTYK  | V      | EMSYNQ | AL     | GKVN   | .....     | VL            | SPNR  |       |       |       |   |       |   |   |   |   |   |   |   |   |   |   |   |   |   |   |       |   |   |   |   |   |   |
| GYSV   | YNFL  | YNP | KILN   | IE     | ETSS  | T     | ILFP   | VEQIGT  | L      | PST    | IS     | V      | CR        | YFDKNHFSVVDAN | ..... |       |       |       |   |       |   |   |   |   |   |   |   |   |   |   |   |   |   |   |       |   |   |   |   |   |   |
| HCRV   | SPED  | I   | YSDWF  | I      | NEAK  | KKN   | NFYIA  | DISGFS  | M      | DWG    | FS     | VMGRT  | .....     | T             | SYWKE |       |       |       |   |       |   |   |   |   |   |   |   |   |   |   |   |   |   |   |       |   |   |   |   |   |   |
| INSV   | KESD  | I   | FPNNF  | I      | EAN   | KG    | SLSCV  | KEVLFV  | V      | KYSNNO | SM     | GKVS   | .....     | VL            | SPTR  |       |       |       |   |       |   |   |   |   |   |   |   |   |   |   |   |   |   |   |       |   |   |   |   |   |   |
| IYSV   | SKED  | I   | YNEWF  | V      | EAK   | RKN   | NFFIA  | ADVSGFS | L      | DYGF   | FS     | VMGKT  | .....     | T             | SYWKE |       |       |       |   |       |   |   |   |   |   |   |   |   |   |   |   |   |   |   |       |   |   |   |   |   |   |
| LNRV   | SPEAF | LP  | SFHT   | I      | NEAL  | KSN   | NVITL  | DT      | TECFAL | D      | GRKVG  | YI     | CTYNG     | .....         | RK    | VVS   |       |       |   |       |   |   |   |   |   |   |   |   |   |   |   |   |   |   |       |   |   |   |   |   |   |
| MSMV   | KETD  | I   | V      | EDRF   | I     | AAAN  | RG     | SLSCV   | KEIMYE | T      | KTSNNQ | AY     | GKVN      | .....         | VL    | SPNR  |       |       |   |       |   |   |   |   |   |   |   |   |   |   |   |   |   |   |       |   |   |   |   |   |   |
| MYSV   | TSED  | F   | HPQGW  | C      | IEECK | KNN   | RFTVA  | ETSCL   | E      | LN     | YG     | SP     | VMGKT     | .....         | V     | AYWRE |       |       |   |       |   |   |   |   |   |   |   |   |   |   |   |   |   |   |       |   |   |   |   |   |   |
| MVBaV  | KPNG  | L   | GP     | AEWY   | L     | E     | ECKRNN | NFYIA   | S      | NGDVT  | D      | YGF    | FS        | VMGKT         | ..... | T     | SYWRE |       |   |       |   |   |   |   |   |   |   |   |   |   |   |   |   |   |       |   |   |   |   |   |   |
| PCSV   | KNYC  | L   | APNAW  | I      | E     | L     | CLRSN  | NFFIA   | S      | ASGDYK | E      | Y      | VMGKT     | .....         | V     | SYWRE |       |       |   |       |   |   |   |   |   |   |   |   |   |   |   |   |   |   |       |   |   |   |   |   |   |
| PNSV   | QEKD  | TIF | DDRY   | IEAAN  | KG    | SLSCV | KEHVYK | V       | EMCENQ | AL     | GKVN   | .....  | VL        | SPNR          |       |       |       |       |   |       |   |   |   |   |   |   |   |   |   |   |   |   |   |   |       |   |   |   |   |   |   |
| PhySMV | TSED  | F   | HPQGW  | C      | IEECK | KNN   | RFTVA  | ETSCL   | E      | LN     | YG     | SP     | VMGKT     | .....         | V     | AYWRE |       |       |   |       |   |   |   |   |   |   |   |   |   |   |   |   |   |   |       |   |   |   |   |   |   |
| PolRSV | AKED  | I   | Y      | RDWF   | I     | NEAE  | RK     | TFFMA   | D      | IAGFS  | L      | DYGF   | FS        | VMGKT         | ..... | T     | SYWRE |       |   |       |   |   |   |   |   |   |   |   |   |   |   |   |   |   |       |   |   |   |   |   |   |
| SVNaV  | CAED  | I   | V      | DDEL   | T     | G     | LLP    | SMN     | I      | TH     | KEDSYK | I      | TKSNNC    | FE            | GKRN  | ..... | M     | M     |   |       |   |   |   |   |   |   |   |   |   |   |   |   |   |   |       |   |   |   |   |   |   |
| TNRSV  | KTNT  | L   | TP     | SAWA   | T     | E     | L      | CIRNN   | N      | FFIS   | M      | G      | GNYR      | L             | E     | Y     | VMGKT | ..... | V | SYWRE |   |   |   |   |   |   |   |   |   |   |   |   |   |   |       |   |   |   |   |   |   |
| TYRV   | SKDD  | MY  | P      | SEWF   | I     | NEAR  | RKN    | NFFIA   | D      | VSGFN  | L      | DYGF   | FS        | VMGKT         | ..... | T     | SYWKE |       |   |       |   |   |   |   |   |   |   |   |   |   |   |   |   |   |       |   |   |   |   |   |   |
| TZSV   | KPKG  | M   | TP     | FDWY   | I     | NECK  | KY     | DFYIS   | D      | NGDIS  | L      | DYGF   | FP        | VMGKT         | ..... | T     | SYWRE |       |   |       |   |   |   |   |   |   |   |   |   |   |   |   |   |   |       |   |   |   |   |   |   |
| WBNV   | RP    | I   | G      | M      | T     | P     | SGWC   | L       | DECR   | RNN    | NFYIA  | A      | ANGELAL   | D             | YGF   | FS    | VMGKT | ..... | T | SYWRE |   |   |   |   |   |   |   |   |   |   |   |   |   |   |       |   |   |   |   |   |   |
| WSMoV  | ASSG  | L   | LP     | SRWC   | L     | DECY  | KSN    | NFYIA   | T      | NGDLT  | L      | DYGF   | FS        | VMGRT         | ..... | T     | SYWRE |       |   |       |   |   |   |   |   |   |   |   |   |   |   |   |   |   |       |   |   |   |   |   |   |
| ZLCV   | KEED  | I   | T      | K      | DRY   | I     | E      | AAN     | R      | G      | S      | L      | S         | C             | V     | K     | E     | Q     | T | Y     | E | V | K | V | C | H | N | Q | A | L | G | K | V | N | ..... | V | L | S | P | N | R |

$\beta 9$   $\beta 10$  TT  
 TSWV 200 210 220 230

|        |       |       |    |   |   |   |   |   |   |   |   |   |       |       |   |   |       |       |       |   |       |   |   |   |   |   |   |   |   |   |   |   |   |   |   |   |   |   |   |   |       |       |       |       |       |       |       |   |   |   |   |
|--------|-------|-------|----|---|---|---|---|---|---|---|---|---|-------|-------|---|---|-------|-------|-------|---|-------|---|---|---|---|---|---|---|---|---|---|---|---|---|---|---|---|---|---|---|-------|-------|-------|-------|-------|-------|-------|---|---|---|---|
| TSWV   | ..... | NV    | H  | E | W | L | Y | S | F | K | P | N | ..... | F     | N | Q | V     | E     | S     | N | N     | R | T | V | N | S | L | A | V | K | S | L | L | M | S | A | E | N | N | I | M     | P     | N     | ..... | S     | Q     | A     | F |   |   |   |
| BeNMV  | W     | I     | G  | T | G | V | V | N | I | H | P | I | G     | Y     | V | L | P     | ..... | K     | A | T     | N | R | C | L | G | T | L | S | L | K | S | M | E | S | T | V | E | K | G | V     | L     | ..... | S     | S     | D     | I     |   |   |   |   |
| CCSV   | N     | ..... | L  | P | R | E | K | I | I | S | V | K | Q     | K     | C | V | ..... | P     | N     | V | S     | A | L | T | N | R | I | L | P | L | T | V | K | A | I | Q | I | A | S | E | ..... | L     | A     | S     | E     | ..... | K     | T | V | V |   |
| CACV   | N     | ..... | I  | S | R | E | K | I | L | S | F | K | H     | K     | S | L | ..... | P     | D     | N | T     | V | P | T | N | R | L | S | T | S | I | V | K | G | I | Q | L | G | S | E | ..... | L     | A     | P     | E     | ..... | T     | T | V | I |   |
| CSNV   | ..... | NV    | H  | E | W | L | Y | S | F | K | P | N | ..... | F     | N | Q | V     | E     | S     | N | N     | R | T | V | N | S | L | A | V | K | S | L | L | L | S | A | E | N | N | I | M     | P     | N     | ..... | S     | Q     | A     | F |   |   |   |
| GBNV   | S     | ..... | I  | S | R | E | K | I | L | S | V | K | Q     | K     | C | L | ..... | P     | D     | N | T     | V | P | T | N | R | L | S | T | S | T | V | K | G | I | Q | L | G | S | E | ..... | L     | A     | P     | D     | ..... | T     | T | V | I |   |
| GCFSV  | ..... | ..... | G  | F | M | T | V | K | A | V | S | E | S     | S     | K | R | T     | Q     | E     | K | A     | H | Q | L | H | N | K | S | L | K | A | L | E | I | V | S | N | S | D | F | R     | S     | T     | Y     | I     | K     | T     | T |   |   |   |
| GRSV   | ..... | NV    | H  | E | W | L | Y | S | F | K | P | N | ..... | F     | N | Q | V     | E     | S     | N | N     | R | T | V | N | S | L | A | V | K | S | L | L | M | A | T | E | N | N | I | M     | P     | N     | ..... | S     | Q     | A     | F |   |   |   |
| GYSV   | ..... | ..... | K  | Y | M | S | V | K | A | V | S | D | G     | A     | K | Y | S     | N     | Q     | S | H     | R | Q | L | H | N | K | N | L | K | A | I | E | I | A | S | V | S | G | I | M     | P     | N     | T     | I     | S     | K     | T |   |   |   |
| HCRV   | N     | ..... | M  | E | K | T | S | L | V | S | V | K | Q     | K     | S | A | ..... | A     | F     | P | S     | V | P | T | N | R | V | L | S | V | S | T | I | K | A | V | E | I | V | S | K     | ..... | I     | A     | C     | D     | ..... | K | S | T | I |
| INSV   | ..... | SV    | H  | E | W | L | Y | T | L | K | P | V | ..... | F     | N | Q | S     | Q     | T     | N | N     | R | T | V | N | T | L | A | V | K | S | L | A | M | S | A | T | S | D | L | M     | S     | D     | ..... | T     | H     | S     | F |   |   |   |
| IYSV   | N     | ..... | M  | D | K | T | S | L | I | S | V | K | Q     | K     | S | M | ..... | N     | N     | P | S     | V | P | T | N | R | L | S | A | S | T | I | K | A | I | E | I | A | S | N | ..... | I     | A     | C     | N     | ..... | K     | S | T | V |   |
| LNRV   | ..... | ..... | S  | Q | G | F | Y | M | A | S | V | K | P     | I     | S | A | V     | S     | K     | G | ..... | K | N | S | N | R | L | S | A | H | L | K | S | V | E | D | F | C | E | M | G     | C     | T     | H     | T     | ..... | Q     | V |   |   |   |
| MSMV   | ..... | NS    | N  | E | W | I | Y | T | V | K | P | M | ..... | F     | N | Q | T     | E     | T     | N | N     | R | T | V | N | S | L | A | I | K | S | L | L | L | S | A | V | N | D | I | S     | P     | O     | ..... | S     | Q     | V     | F |   |   |   |
| MYSV   | N     | ..... | I  | S | G | E | K | L | V | T | V | K | P     | K     | C | I | ..... | N     | V     | P | T     | A | L | P | N | R | L | L | P | S | S | T | V | K | A | I | Q | I | G | S | E     | ..... | L     | A     | K     | ..... | A     | T | V | V |   |
| MVBaV  | N     | ..... | I  | S | R | E | K | I | L | S | V | K | Q     | K     | S | L | ..... | S     | D     | S | T     | V | P | S | N | R | L | S | T | S | T | I | R | A | I | Q | L | G | S | D | ..... | L     | A     | P     | E     | ..... | N     | S | T | I |   |
| PCSV   | N     | ..... | L  | P | K | G | K | M | L | S | I | K | Q     | K     | V | A | ..... | Q     | G     | T | S     | R | L | T | N | R | V | L | S | P | S | A | A | R | A | I | Q | I | A | A | E     | ..... | I     | V     | Q     | N     | ..... | E | N | T | I |
| PNSV   | ..... | ..... | NV | H | E | W | L | Y | S | F | K | P | I     | ..... | F | N | Q     | V     | E     | S | N     | N | R | T | V | N | S | L | A | V | K | S | L | L | M | S | A | E | N | N | I     | M     | P     | N     | ..... | S     | Q     | A | F |   |   |
| PhySMV | N     | ..... | I  | S | G | E | K | L | V | T | V | K | P     | K     | C | I | ..... | N     | V     | P | T     | A | L | P | N | R | L | L | P | L | S | T | V | K | A | I | Q | I | G | S | E     | ..... | L     | A     | K     | ..... | A     | T | V | V |   |
| PolRSV | N     | ..... | L  | E | K | T | S | L | I | S | I | K | Q     | K     | S | A | ..... | G     | N     | P | V     | V | P | T | N | R | L | S | A | G | T | I | K | A | V | E | I | A | S | A | ..... | I     | A     | S     | D     | ..... | K     | T | T | I |   |
| SVNaV  | W     | I     | G  | T | G | N | V | T | S | I | H | P | V     | G     | Y | S | M     | P     | ..... | A | S     | T | N | R | C | I | G | T | L | A | L | K | S | L | E | S | T | A | K | K | G     | I     | R     | ..... | S     | T     | D     | I |   |   |   |
| TNRSV  | N     | ..... | L  | Q | K | E | K | M | L | S | V | K | Q     | K     | V | I | ..... | Q     | G     | T | S     | R | L | T | N | R | V | L | S | P | S | A | V | K | A | I | Q | I | A | S | E     | ..... | L     | V     | Q     | S     | ..... | E | T | T | I |
| TYRV   | N     | ..... | M  | D | K | T | S | L | I | S | V | K | Q     | K     | S | M | ..... | N     | N     | P | L     | V | P | T | N | R | L | S | A | S | T | I | K | A | I | E | I | A | S | N | ..... | I     | A     | C     | N     | ..... | K     | S | T | V |   |
| TZSV   | N     | ..... | I  | P | R | E | K | I | L | S | V | K | Q     | K     | C | L | ..... | P     | N     | T | S     | A | L | T | N | R | I | L | S | L | S | T | V | R | A | I | Q | I | A | S | E     | ..... | L     | A     | S     | E     | ..... | K | T | V | V |
| WBNV   | N     | ..... | M  | S | R | E | K | I | L | S | V | K | Q     | K     | S | L | ..... | P     | D     | N | T     | V | P | T | N | R | L | S | T | S | T | V | K | G | I | Q | L | G | S | E | ..... | L     | A     | S     | D     | ..... | T     | T | V | I |   |
| WSMoV  | S     | ..... | M  | S | R | E | K | I | L | S | V | K | Q     | K     | C | F | ..... | S     | D     | N | T     | V | P | T | N | R | L | S | T | S | T | V | K | G | I | Q | L | G | S | E | ..... | L     | A     | S     | D     | ..... | T     | T | V | I |   |
| ZLCV   | ..... | NV    | H  | E | C | L | Y | S | F | K | P | N | ..... | F     | N | Q | V     | E     | S     | N | N     | R | T | V | N | S | L | A | I | K | S | L | L | M | S | V | K | N | E | I | M     | P     | N     | ..... | S     | Q     | A     | F |   |   |   |

$\eta 2$   $\beta 11$   $\eta 3$  TT  $\beta 12$   
 TSWV 240 250 260 270 280 290

|       |   |   |   |   |   |   |   |   |   |   |   |   |   |   |   |   |       |       |   |   |   |   |   |   |   |   |   |   |   |   |   |   |   |   |   |   |   |   |   |   |   |   |   |   |   |   |       |       |   |   |   |   |   |   |       |       |       |       |
|-------|---|---|---|---|---|---|---|---|---|---|---|---|---|---|---|---|-------|-------|---|---|---|---|---|---|---|---|---|---|---|---|---|---|---|---|---|---|---|---|---|---|---|---|---|---|---|---|-------|-------|---|---|---|---|---|---|-------|-------|-------|-------|
| TSWV  | V | K | A | S | T | D | S | H | F | K | L | S | L | W | L | R | ..... | V     | P | K | . | V | L | K | Q | I | S | I | O | R | L | F | K | V | A | G | D | E | T | N | . | K | T | F | Y | L | S     | ..... | I | A | C | I | P | N | H     | N     | S     | V     |
| BeNMV | A | H | A | E | L | S | L | G | G | K | C | N | F | H | L | F | S     | ..... | S | C | K | G | D | L | G | D | V | S | F | M | R | N | V | K | F | F | E | D | K | H | E | R | V | F | T | I | Y     | V     | K | T | S | S | D | I | N     | ..... | N     | ..... |
| CCSV  | L | A | S | R | Q | R | L | D | I | D | V | K | S | Q | Y | R | V     | ..... | S | F | P | G | I | Q | D | E | G | A | F | T | R | T | F | C | I | P | M | D | N | T | A | R | I | C | F | Y | A     | K     | T | S | V | D | S | N | ..... | ..... |       |       |
| CACV  | L | S | C | K | Q | N | L | D | I | D | L | K | S | Q | Y | R | I     | ..... | S | F | H | G | I | Q | E | E | G | A | F | T | R | T | F | C | I | P | F | E | N | K | S | R | I | C | F | Y | A     | K     | T | V | A | D | N | S | N     | ..... | ..... |       |
| CSNV  | V | K | A | S | T | D | S | H | F | K | L | T | L | W | L | R | ..... | I     | P | K | . | V | L | K | Q | I | S | S | O | R | L | F | K | I | A | G | D | E | T | N | . | K | E | F | Y | S | ..... | I     | A | C | I | P | N | H | N     | S     | V     |       |
| GBNV  | L | S | L | K | Q | N | L | N | V | D | L | K | S | Q | Y | R | V     | ..... | S | F | H | G | I | Q | E | E | G | A | F | A | R | T |   |   |   |   |   |   |   |   |   |   |   |   |   |   |       |       |   |   |   |   |   |   |       |       |       |       |



|               |      |     |     |     |     |
|---------------|------|-----|-----|-----|-----|
| <i>TSWV</i>   | ▶TTT | β22 | 450 | β23 | 460 |
| <i>TSWV</i>   |      |     |     |     |     |
| <i>BeNMV</i>  |      |     |     |     |     |
| <i>CCSV</i>   |      |     |     |     |     |
| <i>CACV</i>   |      |     |     |     |     |
| <i>CSNV</i>   |      |     |     |     |     |
| <i>GBNV</i>   |      |     |     |     |     |
| <i>GCFSV</i>  |      |     |     |     |     |
| <i>GRSV</i>   |      |     |     |     |     |
| <i>GYSV</i>   |      |     |     |     |     |
| <i>HCRV</i>   |      |     |     |     |     |
| <i>INSV</i>   |      |     |     |     |     |
| <i>IYSV</i>   |      |     |     |     |     |
| <i>INRV</i>   |      |     |     |     |     |
| <i>MSMV</i>   |      |     |     |     |     |
| <i>MYSV</i>   |      |     |     |     |     |
| <i>MVBaV</i>  |      |     |     |     |     |
| <i>PCSV</i>   |      |     |     |     |     |
| <i>PNSV</i>   |      |     |     |     |     |
| <i>PhySMV</i> |      |     |     |     |     |
| <i>PolRSV</i> |      |     |     |     |     |
| <i>SVNaV</i>  |      |     |     |     |     |
| <i>TNRSV</i>  |      |     |     |     |     |
| <i>TYRV</i>   |      |     |     |     |     |
| <i>TZSV</i>   |      |     |     |     |     |
| <i>WBNV</i>   |      |     |     |     |     |
| <i>WSMoV</i>  |      |     |     |     |     |
| <i>ZLCV</i>   |      |     |     |     |     |
